# Supplementary material
Source: HighWire-hosted journal article supplement (https://qualitysafety.bmj.com/content/26/5/372)
Supplement: inline-supplementary-material-2 [file inline-supplementary-material-2.pdf]

**Appendix 2. Example of Clinical Summary from Hospital/Vendor B**

Patient Depart Summary

Result Date:  
Encounter info: Inpatient, 14

Patient Depart Summary (Verified)

**Patient Depart Summary**

**\*\*THIS PAGE TO BE SEPARATED AND PLACED IN THE PATIENT CHART AFTER SIGNATURES OBTAINED. DO NOT GIVE THIS PAGE TO THE PATIENT\*\***

This information has been discussed with me, \_\_\_\_\_, and/or guardian, I have had an opportunity to ask questions.

\_\_\_\_\_  
Patient/Family/Legal Representative Signature

\_\_\_\_\_  
Date

\_\_\_\_\_  
Nursing or Provider Signature

\_\_\_\_\_  
Date

**Note: Permanent Medical Record**

**For details of this discharge, please see the Electronic Health Record.**

Printed by:  
Printed on:

Page 1 of 12  
(Continued)

# Patient Depart Summary

DO NOT MARK BELOW THIS LINE

BARCODE ZONE

DO NOT MARK BELOW THIS LINE

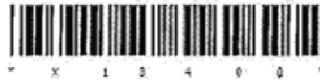

Printed by:  
Printed on:

Page 2 of 12  
(Continued)

Patient Depart Summary

**Patient Depart Summary**

**Name:**  
**Date/Time of Admission:**  
**Attending Provider Information:**  
**Name**

**Medical Record Number:**  
**Date of Birth:**  
**Phone Number:**

**Encounter Diagnoses**  
End stage renal disease ( )  
Hyperkalemia ( )

**Lab Result Information:**

| <u>Test</u> | <u>Result</u> | <u>Result Dt/Tm</u> |
|-------------|---------------|---------------------|
| A1c         | 5.8 % [HI]    |                     |

**Follow Up Information:**

**With:**                      **Address:**                      **When:**  
Dialysis                      MI

Printed by:  
Printed on:

Patient Depart Summary

**Comments:**

**With:**

**Address:**

**When:**

Internal Medicine Residency

/14 15:30

**Comments:**

Will followup with Dr.

in clinic

Printed by:  
Printed on:

Page 4 of 12  
(Continued)

## Patient Depart Summary

These are the medications you should be taking. Call your doctor if this list does not match what you think you should be taking. Bring this list to any follow up doctor's appointments for updating.

### Your Complete Medication List:

| <u>Medication Name, Product Strength</u>                                                          | <u>Dose, Route, How Often</u>                                                                                                           |
|---------------------------------------------------------------------------------------------------|-----------------------------------------------------------------------------------------------------------------------------------------|
| <b>acetaminophen 325 mg oral tablet (acetaminophen)</b>                                           | 325 mg = 1 tab(s), By mouth, Four times a day As Needed for as needed for pain                                                          |
| <b>Norco 5 mg-325 mg oral tablet (acetaminophen-hydrocodone)</b>                                  | 2 tab(s), By mouth, Every four hours As Needed for mild pain                                                                            |
| <b>albuterol HFA 90 mcg/inh Inhaler (albuterol)</b>                                               | 2 puff(s), Puff, Every six hours As Needed for as needed for wheezing                                                                   |
| <b>Norvasc 5 mg oral tablet (amlODIPine)</b>                                                      | 5 mg = 1 tab(s), By mouth, Daily As Needed for Elevated Blood Pressure, Pt States Only As Needed Due To Medication Dropping BP Too Much |
| <b>aspirin 81 mg oral enteric coated tablet (aspirin)</b>                                         | 81 mg = 1 tab(s), By mouth, Daily                                                                                                       |
| <b>betamethasone dipropionate 0.05% Oint (betamethasone topical)</b>                              | 1 application, Topical, Twice a day Spec. Instr. = as directed to affected area                                                         |
| <b>Tums 500 mg oral tablet, chewable (calcium carbonate)</b>                                      | 500 mg = 1 tab(s), By mouth, as ordered PRN As Needed for .                                                                             |
| <b>Coreg 25 mg oral tablet (carVEDILOL)</b>                                                       | 25 mg = 1 tab(s), By mouth, Twice a day                                                                                                 |
| <b>Vitamin D3 1000 intl units oral tablet (cholecalciferol)</b>                                   | 1,000 intl_units = 1 tab(s), By mouth, Twice a day                                                                                      |
| <b>cloNIDine 0.1 mg oral tablet (cloNIDine)</b>                                                   | 0.3 mg = 3 tab(s), By mouth, Three times a day                                                                                          |
| <b>epoetin alfa 20,000 units/mL injectable solution (epoetin alfa)</b>                            | 2,200 unit(s) = 0.11 mL, Extracorporeal, as ordered PRN As Needed for see comments                                                      |
| <b>ferrous sulfate 325 mg (65 mg elemental iron) oral enteric coated tablet (ferrous SULfate)</b> | 325 mg = 1 tab(s), By mouth, Daily                                                                                                      |

Printed by:  
Printed on:

Page 5 of 12  
(Continued)

## Patient Depart Summary

|                                                                               |                                                                                 |
|-------------------------------------------------------------------------------|---------------------------------------------------------------------------------|
| <b>Flonase 50 mcg/inh nasal spray (fluticasone nasal)</b>                     | 1 spray(s), Nasal-BOTH nostril(s), Daily                                        |
| <b>Lasix 40 mg oral tablet (FUROsemide)</b>                                   | 40 mg = 1 tab(s), By mouth, Daily                                               |
| <b>GlucaGen 1 mg injection (glucagon)</b>                                     | 1 mg, Under the skin, One time only As Needed for hypoglycemia                  |
| <b>glucose 5 gm oral tablet, chewable (GLUCOSE)</b>                           | 15 Gm = 3 tab(s), By mouth, One time only As Needed for low blood sugar         |
| <b>NovoLOG FlexPen 100 units/mL subcutaneous solution (insulin aspart)</b>    | sliding scale, Under the skin, Three times a day before meals                   |
| <b>insulin glargine 100 units/mL subcutaneous solution (insulin glargine)</b> | 5 unit(s) = 0.05 mL, Under the skin, Every evening - at bedtime                 |
| <b>Imdur 30 mg oral tablet, extended release (isosorbide mononitrate)</b>     | 30 mg = 1 tab(s), By mouth, Daily                                               |
| <b>Xalatan ophthalmic 0.005% solution (latanoprost ophthalmic)</b>            | 1 drop(s), Both eyes, Every evening - at bedtime                                |
| <b>lidocaine 5% Oint (lidocaine topical)</b>                                  | 1 application, Topical, Twice a day As Needed for .                             |
| <b>lisinopril 40 mg oral tablet (lisinopril)</b>                              | 40 mg = 1 tab(s), By mouth, Daily                                               |
| <b>Renal Caps oral (multivitamin)</b>                                         | 1 cap(s), By mouth, Daily                                                       |
| <b>PriLOSEC 20 mg oral delayed release capsule (omeprazole)</b>               | 20 mg = 1 cap(s), By mouth, Daily                                               |
| <b>ondansetron 4 mg oral tablet (ondansetron)</b>                             | 4 mg = 1 tab(s), By mouth, Every four hours As Needed for nausea/vomiting       |
| <b>paricalcitol 5 mcg/mL intravenous solution (paricalcitol)</b>              | 3 mcg = 0.6 mL, Intravenous, Every Tuesday, Thursday, and Saturday              |
| <b>MiraLax oral powder for reconstitution (polyethylene glycol 3350)</b>      | 17 Gm, By mouth, Daily As Needed for constipation, Dissolve in 8 ounces liquid. |
| <b>SEROquel 400 mg oral tablet (QUETiapine)</b>                               | 400 mg = 1 tab(s), By mouth, Every evening - at bedtime                         |

Printed by:  
Printed on:

Page 6 of 12  
(Continued)

## Patient Depart Summary

|                                                           |                                                                             |
|-----------------------------------------------------------|-----------------------------------------------------------------------------|
| <b>SEROquel 25 mg oral tablet (QUetiapine)</b>            | 25 mg = 1 tab(s), By mouth, Twice a day Spec. Instr. = in the AM & 3pm      |
| <b>Zoloft 100 mg oral tablet (sertraline)</b>             | 200 mg = 2 tab(s), By mouth, Daily                                          |
| <b>sevelamer carbonate 800 mg oral tablet (sevelamer)</b> | 2,400 mg = 3 tab(s), By mouth, Three times a day Spec. Instr. = with snacks |
| <b>traMADol 50 mg oral tablet (traMADol)</b>              | 100 mg = 2 tab(s), By mouth, Every evening - at bedtime                     |
| <b>traZODone 100 mg oral tablet (traZODone)</b>           | 200 mg = 2 tab(s), By mouth, Every evening - at bedtime                     |

Printed by:  
Printed on:

Page 7 of 12  
(Continued)

## Patient Depart Summary

### MEDICATIONS THAT HAVE CHANGED

#### Other Medications

NEW (You are now on):**sevelamer (sevelamer carbonate 800 mg oral tablet) 3 tab(s)**, By mouth, Three times a day, with snacks

OLD (You were on):**sevelamer (sevelamer carbonate 800 mg oral tablet) 3 tab(s)**, By mouth, Three times a day with meals

### MEDICATIONS THAT HAVE NOT CHANGED

#### Other Medications

**acetaminophen (acetaminophen 325 mg oral tablet) 1 tab(s)**, By mouth, Four times a day, As Needed, as needed for pain

**acetaminophen-hydrocodone (Norco 5 mg-325 mg oral tablet) 2 tab(s)**, By mouth, Every four hours, As Needed, for mild pain

**albuterol (albuterol HFA 90 mcg/inh Inhaler) 2 puff(s)**, Puff, Every six hours, As Needed, as needed for wheezing

**amlodipine (Norvasc 5 mg oral tablet) 1 tab(s)**, By mouth, Daily, , As Needed, Elevated Blood Pressure

**aspirin (aspirin 81 mg oral enteric coated tablet) 1 tab(s)**, By mouth, Daily

**betamethasone topical (betamethasone dipropionate 0.05% Oint) 1 application**, Topical, Twice a day, as directed to affected area

**calcium carbonate (Tums 500 mg oral tablet, chewable) 1 tab(s)**, By mouth, as ordered PRN, As Needed, .

**carvedilol (Coreg 25 mg oral tablet) 1 tab(s)**, By mouth, Twice a day

**cholecalciferol (Vitamin D3 1000 intl units oral tablet) 1 tab(s)**, By mouth, Twice a day



## Patient Depart Summary

**clonidine (clonidine 0.1 mg oral tablet)** 3 tab(s), By mouth, Three times a day

**epoetin alfa (epoetin alfa 20,000 units/mL injectable solution)** 0.11 mL, Extracorporeal, as ordered PRN, As Needed, see comments

**ferrous sulfate (ferrous sulfate 325 mg (65 mg elemental iron) oral enteric coated tablet)** 1 tab(s), By mouth, Daily

**fluticasone nasal (Flonase 50 mcg/inh nasal spray)** 1 spray(s), Nasal-BOTH nostril(s), Daily

**furosemide (Lasix 40 mg oral tablet)** 1 tab(s), By mouth, Daily

**glucagon (GlucaGen 1 mg injection)** 1 mg, Under the skin, One time only, As Needed, hypoglycemia

**GLUCOSE (glucose 5 gm oral tablet, chewable)** 3 tab(s), By mouth, One time only, As Needed, low blood sugar

**insulin aspart (NovoLOG FlexPen 100 units/mL subcutaneous solution)**, sliding scale, Under the skin, Three times a day before meals

**insulin glargine (insulin glargine 100 units/mL subcutaneous solution)** 0.05 mL, Under the skin, Every evening - at bedtime

**isosorbide mononitrate (Imdur 30 mg oral tablet, extended release)** 1 tab(s), By mouth, Daily

**latanoprost ophthalmic (Xalatan ophthalmic 0.005% solution)** 1 drop(s), Both eyes, Every evening - at bedtime

**lidocaine topical (lidocaine 5% Oint)** 1 application, Topical, Twice a day, As Needed, .

**lisinopril (lisinopril 40 mg oral tablet)** 1 tab(s), By mouth, Daily

**multivitamin (Renal Caps oral)** 1 cap(s), By mouth, Daily

**omeprazole (PriLOSEC 20 mg oral delayed release capsule)** 1 cap(s), By mouth, Daily

**ondansetron (ondansetron 4 mg oral tablet)** 1 tab(s), By mouth, Every four hours, As Needed,

Printed by:  
Printed on:

Page 9 of 12  
(Continued)

## Patient Depart Summary

nausea/vomiting

**paricalcitol (paricalcitol 5 mcg/mL intravenous solution)** 0.6 mL, Intravenous, Every Tuesday, Thursday, and Saturday

**polyethylene glycol 3350 (MiraLax oral powder for reconstitution)** 17 Gm, By mouth, Daily, As Needed, constipation

**QUetiapine (SEROquel 25 mg oral tablet)** 1 tab(s), By mouth, Twice a day, in the AM & 3pm

**QUetiapine (SEROquel 400 mg oral tablet)** 1 tab(s), By mouth, Every evening - at bedtime

**sertraline (Zoloft 100 mg oral tablet)** 2 tab(s), By mouth, Daily

**traMADol (traMADol 50 mg oral tablet)** 2 tab(s), By mouth, Every evening - at bedtime

**traZODone (traZODone 100 mg oral tablet)** 2 tab(s), By mouth, Every evening - at bedtime

### STOP TAKING THESE MEDICATIONS:

Med Rec Tech history complete for admission , Per Pt Conversation/DC List/cgc

**Allergies:** Bactrim; Septra; sulfa drugs

### Patient Discharge Information

#### Instructions Given:

##### Diet

**Diet** Eat or drink less than 2,000mg of salt (sodium) every day

**Diet** Do not add salt to your food

**Diet** Drink less than 2 liters of fluid, every day

##### Activity

Printed by:  
Printed on:

Page 10 of 12  
(Continued)

## Patient Depart Summary

**Do Not Smoke** or use tobacco

**Activity** Weigh yourself, every day

### Restrictions

**May Return To Work** when told by the doctor

**Start Driving** when told by the doctor, Do Not drive at this time

### Call Your Doctor

**Call The Doctor If You** have trouble breathing while lying down

**Call The Doctor If You** have more trouble breathing than you usually do

**Call The Doctor If You** have a temperature of 101 degrees Fahrenheit or higher

**Call 911** If you have any chest pain

**Call 911** If you have sudden numbness or weakness of face, arm or leg - especially on one side; confusion, trouble speaking, trouble seeing or trouble walking or if you have a really bad headache with no known cause.

**MD, House Staff** has reviewed and approved the discharge plan of care as described above. The authorizing physician and electronic signature for medications is recorded in the order entry system.

### Sign up for [MyChart](#), your secure online medical record.

We consider it a privilege to care for you and your family. Our goal is to provide the highest quality care possible. If you receive a patient satisfaction survey, please complete it. Your feedback is very important to us in improving your care.

How to obtain your health information:

- To see your results and other information go to [MyChart.org](#).
- Not yet enrolled in MyChart? Visit [MyChart.org](#) to sign up – it's free and takes just

Printed by:  
Printed on:

Page 11 of 12  
(Continued)

## Patient Depart Summary

minutes.

This document may be incomplete. Three (3) days after your visit, you can view a final version on [www.](#) [.ORG.](#) at

Please contact us if any of your information appears incorrect.

Note: First page signed by patient and retained by Health Information Management

### Completed Action List:

- \*
- \*
- \*

Printed by:  
Printed on:

Page 12 of 12  
(End of Report)
